# Supplementary material
Source: publisher figshare collection journal article supplement (https://frontiersin.figshare.com/ndownloader/files/34772464)

psb family GC content

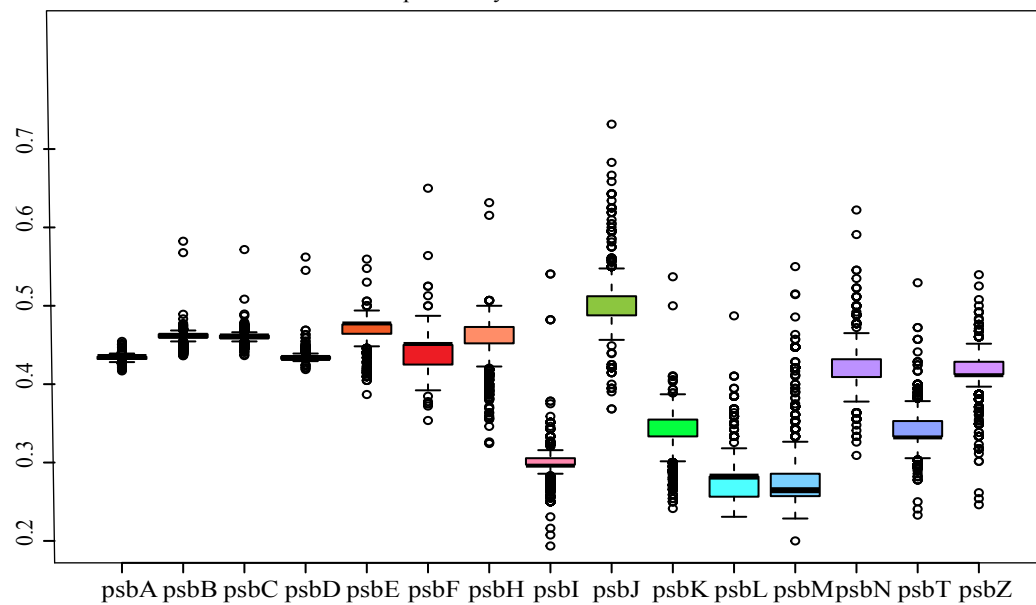

psbB/H/N/T GC content

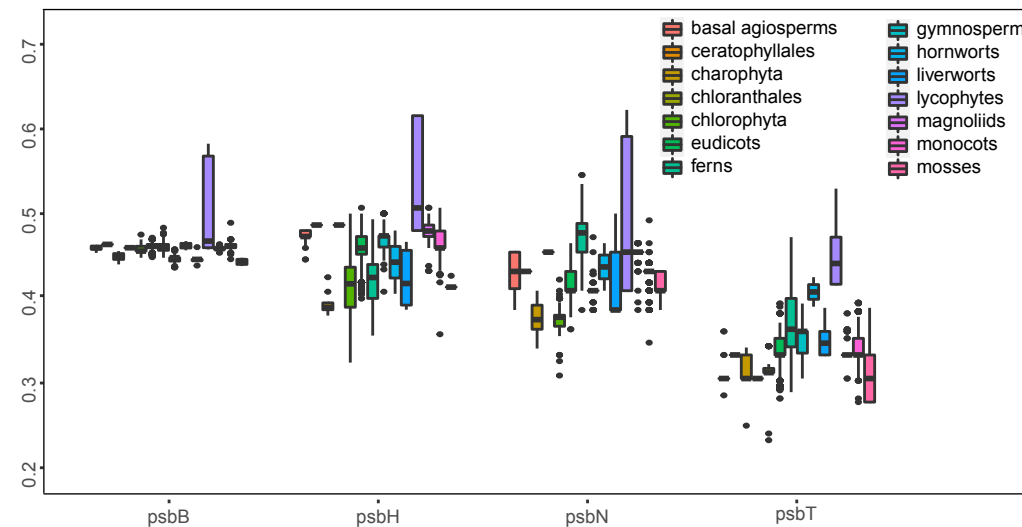

psbJ GC content

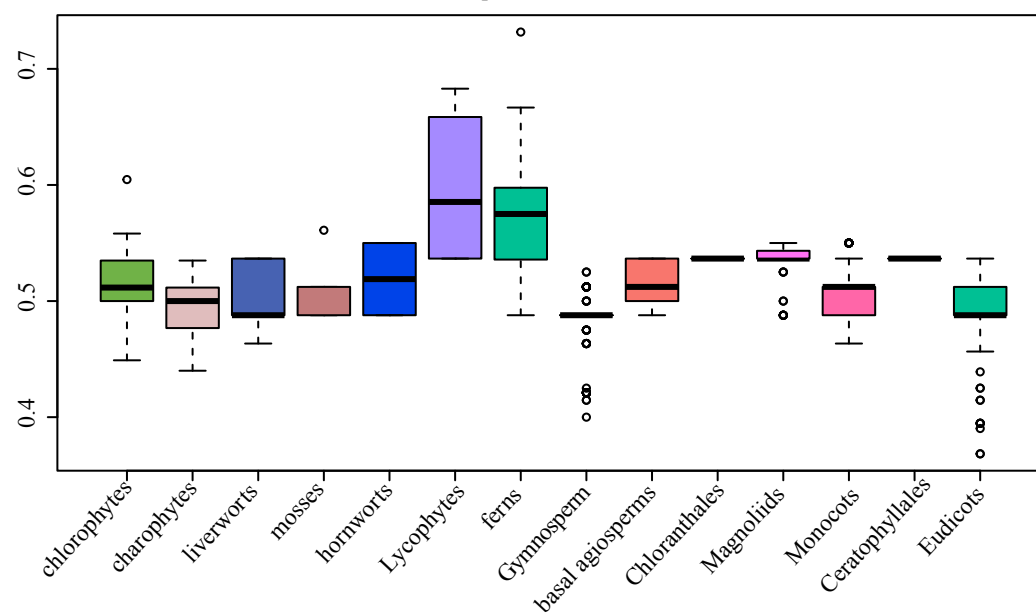

psbI GC content

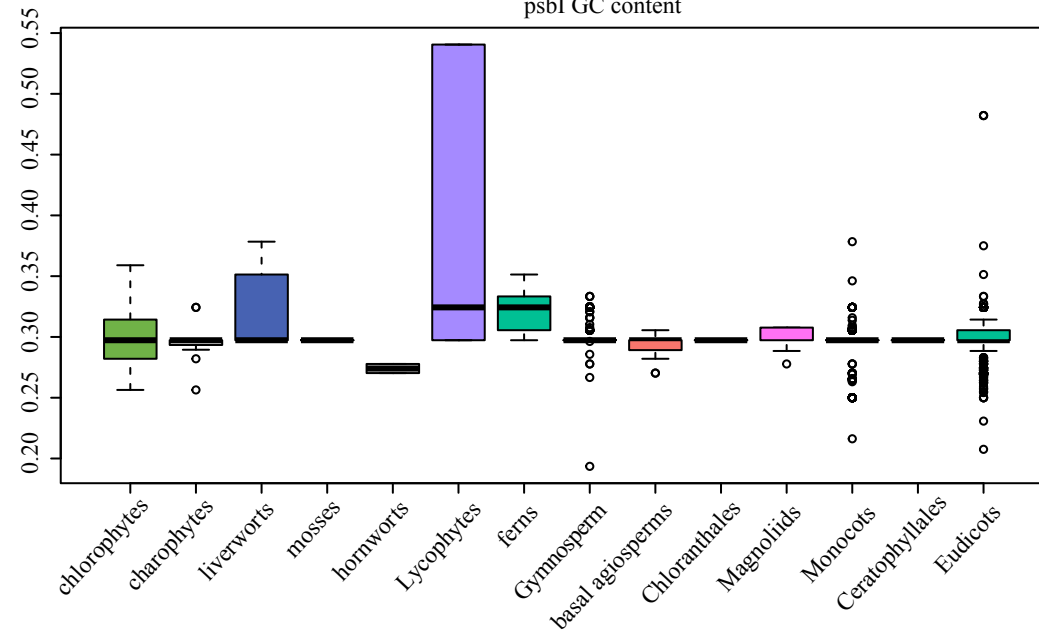

Supplement: Supplementary file [file 34772464]
